# Supplementary material for: Gelation-induced controlled synthesis of TiO2 with tunable phase transition for efficient photocatalytic hydrogen evolution
Source: Royal Society of Chemistry journal article supplement (doi:10.1039/d4qi00193a), 2024-01-01
Supplement: d4qi00193a1.pdf [file d4qi00193a1.pdf]

## **Gelation-induced controlled synthesis of TiO<sub>2</sub> with tunable phase transition for efficient photocatalytic hydrogen evolution**

Wenwei Lei, <sup>\*a</sup> Ying Wang,<sup>a</sup> Hongji Wang,<sup>a</sup> Norihiro Suzuki,<sup>b</sup> Chiaki Terashima<sup>\*c</sup>  
and Akira Fujishima<sup>c</sup>

<sup>a</sup> Hebei Key Laboratory of Nano-biotechnology, School of Environmental and Chemical Engineering, Yanshan University, Qinhuangdao 066004, Hebei, China

<sup>b</sup> Department of Natural Sciences, School of Engineering, Tokyo Denki University, 5 Senjyu Asahi-cho, Adachi-ku, Tokyo 120-8551, Japan

<sup>c</sup> Research Center for Space System Innovation, Tokyo University of Science, 2641 Yamazaki, Noda, Chiba 278-8510, Japan

<sup>d</sup> Institute of Photochemistry and Photomaterials, University of Shanghai for Science and Technology, Shanghai 2000093, P.R. China

### **Corresponding Authors.**

E-mail: leiww@ysu.edu.cn (Wenwei Lei); terashima@rs.tus.ac.jp (Terashima)

## Table of Contents

|                                                                                                                                                         |    |
|---------------------------------------------------------------------------------------------------------------------------------------------------------|----|
| <b>1. Supplementary Methods</b> .....                                                                                                                   | 3  |
| <b>2. Supplementary Figures</b> .....                                                                                                                   | 4  |
| <b>Fig. S1</b> SEM morphology images of $A_xR_y$ -TiO <sub>2</sub> obtained under different synthesis conditions.....                                   | 4  |
| <b>Fig. S2</b> Nitrogen adsorption–desorption isotherms of commercial P25 and $A_{76}/R_{24}$ -TiO <sub>2</sub> .....                                   | 5  |
| <b>Fig. S3</b> Full XPS spectra of commercial P25 and $A_{76}/R_{24}$ -TiO <sub>2</sub> .....                                                           | 6  |
| <b>Fig. S4</b> EPR spectra measured at room temperature of commercial P25 and $A_{76}/R_{24}$ -TiO <sub>2</sub> .....                                   | 7  |
| <b>Fig. S5</b> Hydrogen production from photocatalyst as a function of time.....                                                                        | 8  |
| <b>Fig. S6</b> Photocatalytic decomposition of methylene blue.....                                                                                      | 9  |
| <b>Fig. S7</b> XRD and XPS tests of $A_{76}/R_{24}$ -TiO <sub>2</sub> before and after 6 cycles (24h) of photocatalytic H <sub>2</sub> production ..... | 10 |
| <b>Fig. S8</b> Photoelectrochemical responses of commercial P25 and $A_{76}/R_{24}$ -TiO <sub>2</sub> .....                                             | 11 |
| <b>Fig. S9</b> EIS of commercial P25 and $A_{76}/R_{24}$ -TiO <sub>2</sub> under AM1.5 irradiation .....                                                | 12 |
| <b>Fig. S10</b> PL spectra of commercial P25 and $A_{76}/R_{24}$ -TiO <sub>2</sub> .....                                                                | 13 |
| <b>3. Supplementary Tables</b> .....                                                                                                                    | 14 |
| <b>Table S1</b> Comparison of the H <sub>2</sub> evolution efficiency for the TiO <sub>2</sub> -based catalysts without using any co-catalysts.....     | 14 |
| <b>Table S2</b> Comparison of the H <sub>2</sub> evolution efficiency for the TiO <sub>2</sub> -based catalysts with co-catalysts.....                  | 15 |
| <b>Table S3</b> Comparison of methods that can modulate the composition of the TiO <sub>2</sub> phase .....                                             | 16 |
| <b>4. Supplementary References</b> .....                                                                                                                | 16 |

## 1. Supplemental Methods

**Materials:** Commercial P25 was obtained from Degussa (Germany). Polyvinyl alcohol (PVA, average Mw 130,000, 99+% hydrolyzed) was obtained from Sigma–Aldrich. N-methyl pyrrolidone (NMP) was obtained from TCI.  $\text{TiCl}_4$  was obtained from Wako. All the chemicals used without further purification.

### **Characterization :**

The obtained catalysts were characterized morphologically and structurally by field emission scanning electron microscopy (FE-SEM; JSM-7600 F, JEOL, Japan) as well as transmission electron microscopy. The phase structure changes of the catalysts were investigated by X-ray diffractometer (XRD; Ultima IV, Rigaku, Japan) and Raman scattering spectrometer (NRS-5100, Jasco, Japan). Ultraviolet-visible-near-infrared (UV-vis-NIR) spectra were performed with a JASCO V-670 spectrophotometer. The surface elemental composition and changes were analyzed by XPS (ESCA-3400, Shimadzu, Japan). The photocurrent density of the catalyst films was measured with a constant potential meter (Versa STAT 4, METEK, USA) under a three-electrode system at a constant voltage of 0.8 V. The catalyst films were analyzed by XPS (ESCA-3400, Shimadzu, Japan). Silver/silver chloride and platinum wires were used as reference and counter electrodes, respectively. The electrolyte solution was 0.5 M  $\text{Na}_2\text{SO}_4$ . A thin film of catalyst for the working electrode was prepared by sonication by dispersing 20 mg of catalyst into 5 mL of 95 v/v% ethanol. Then 3 mL of the mixture was dropped onto fluorine-doped tin oxide (FTO) glass, and the catalyst was homogeneously dispersed onto the FTO surface by the scraping method. The catalyst-modified FTO glass was then dried at 70 °C for 24 hours.

## 2. Supplementary Figures

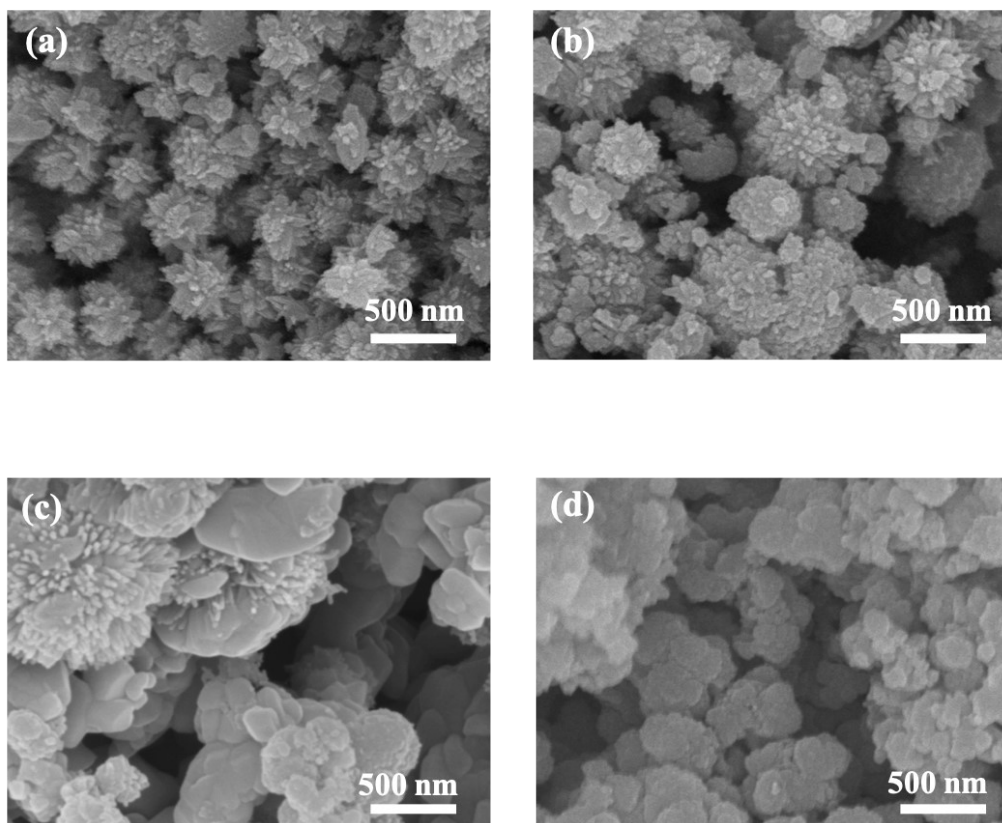

**Fig. S1.** The SEM images of (a)  $A_{100}$ -TiO<sub>2</sub>, (b)  $A_{92}/R_8$ -TiO<sub>2</sub> (c)  $A_{44}/R_{56}$ -TiO<sub>2</sub> and (d)

$A_7/R_{93}$ -TiO<sub>2</sub>

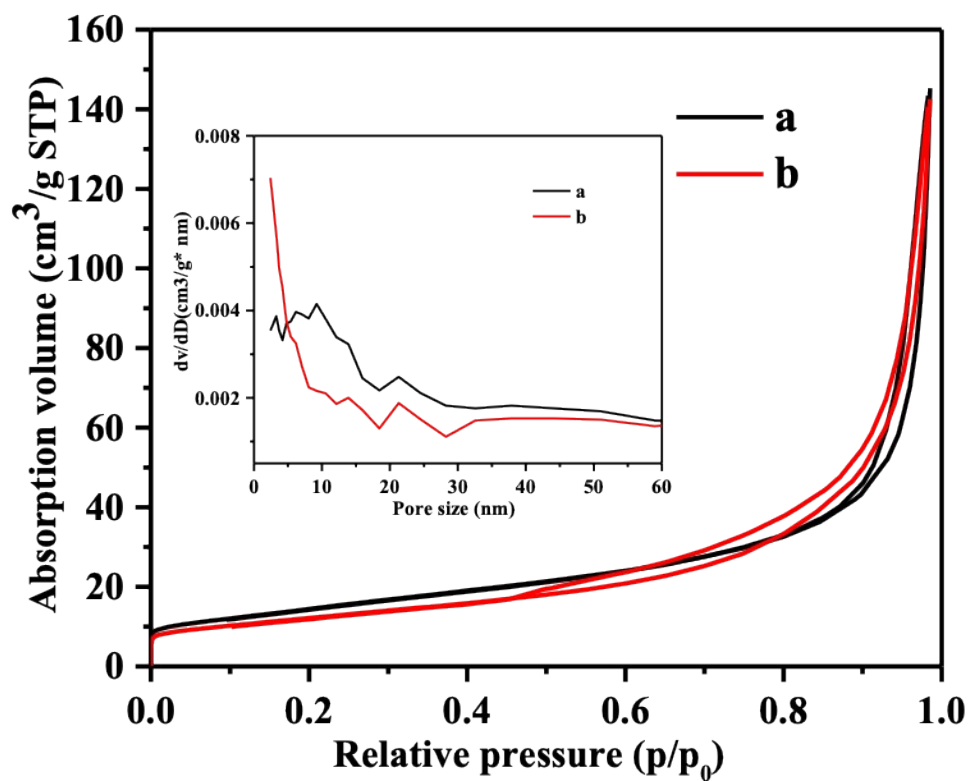

**Fig. S2.** The nitrogen adsorption–desorption isotherms of (a) the commercial P25 and (b) A<sub>76</sub>/R<sub>24</sub>-TiO<sub>2</sub>. The insets image is the corresponding pore size distribution curves.

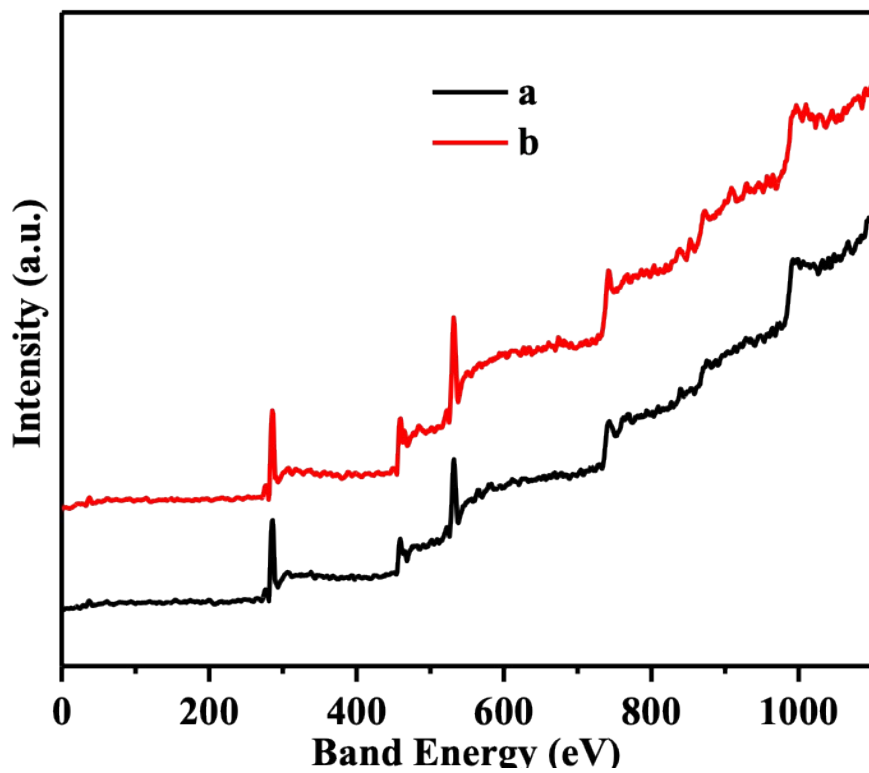

**Fig. S3.** The full X-ray photoelectron spectra (XPS) spectra of (a) the commercial P25 and (b)  $A_{76}/R_{24}\text{-TiO}_2$ .

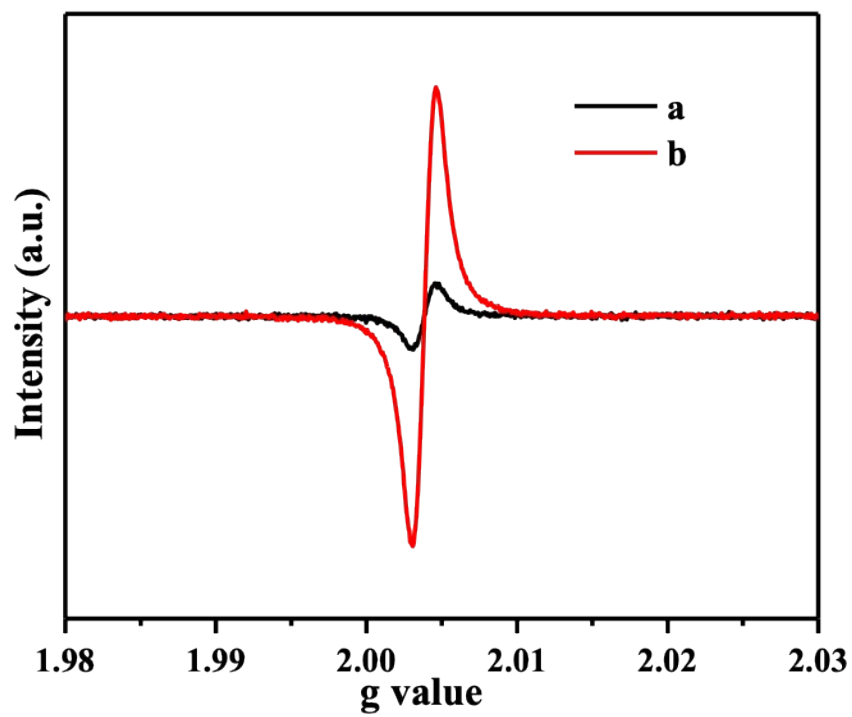

**Fig. S4.** The EPR spectra measured at room temperature of (a) the commercial P25 and (b)  $A_{76}/R_{24}\text{-TiO}_2$ .

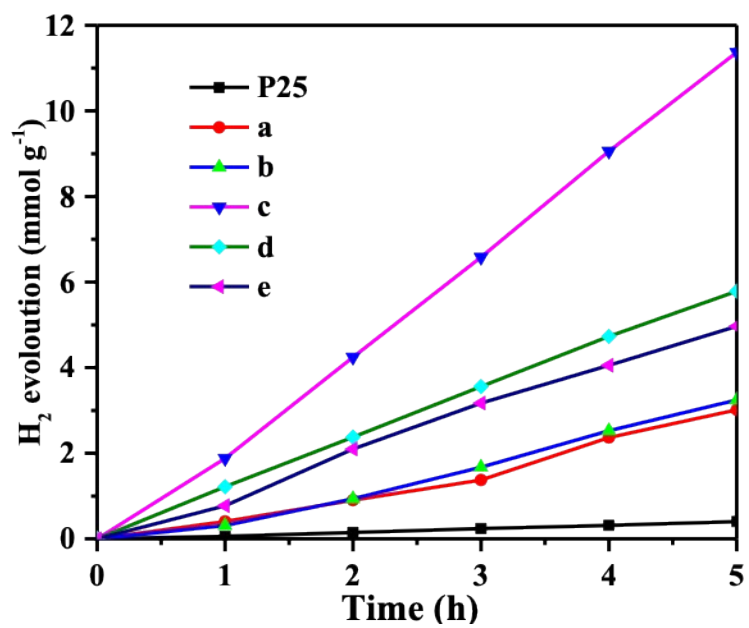

**Fig. S5.** Hydrogen production from various TiO<sub>2</sub> photocatalysts as a function of time under AM 1.5 light irradiation, (a) A<sub>100</sub>-TiO<sub>2</sub>, (b) A<sub>92</sub>/R<sub>8</sub>- TiO<sub>2</sub>, (c) A<sub>76</sub>/R<sub>24</sub>- TiO<sub>2</sub>, (d) A<sub>44</sub>/R<sub>56</sub>- TiO<sub>2</sub>, and (e) A<sub>7</sub>/R<sub>93</sub>- TiO<sub>2</sub>.



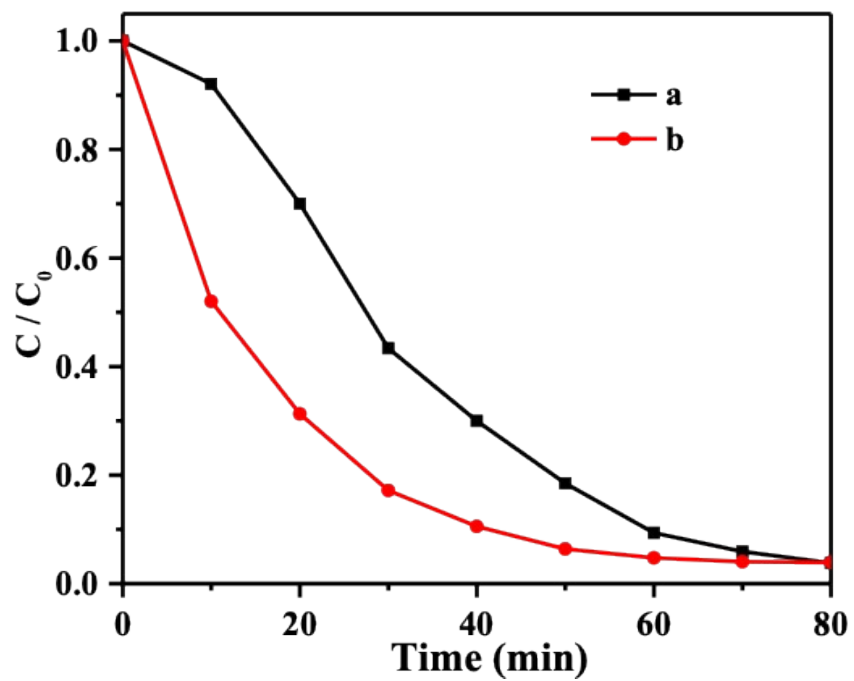

**Fig. S6.** The photocatalytic decomposition of methylene blue ( $10 \text{ mg L}^{-1}$ ) use (a) the commercial P25 and (b)  $A_{76}/R_{24}\text{-TiO}_2$ .

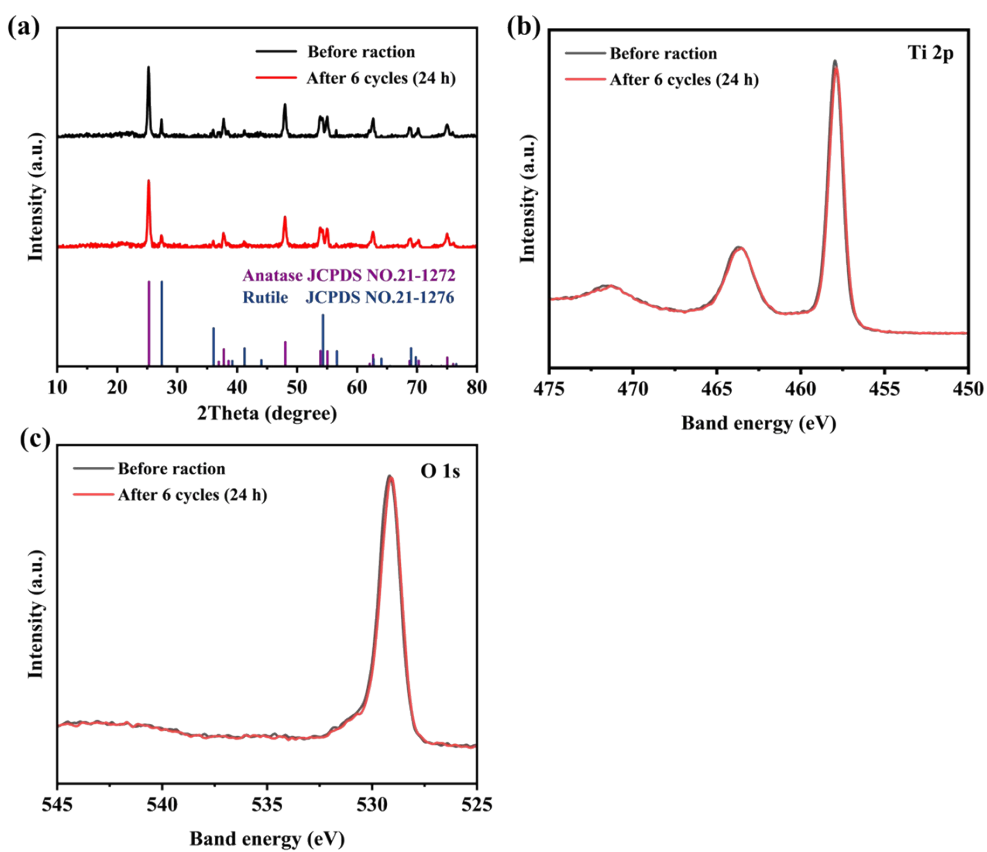

**Fig.S7.** XRD and XPS tests of  $A_{76}/R_{24}\text{-TiO}_2$  before and after 6 cycles (24h) of photocatalytic  $\text{H}_2$  production. (a) XRD patterns; High-resolution Ti 2p (b) and O 1s (c) XPS spectra.

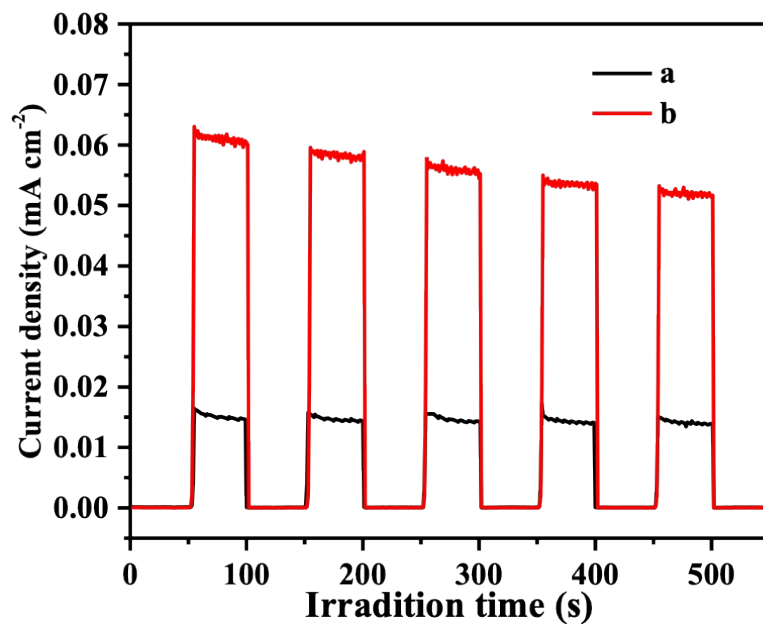

**Fig. S8.** The photoelectrochemical responses of (a) the commercial P25 and (b)  $A_{76}/R_{24}$ -TiO<sub>2</sub> under AM1.5 irradiation.

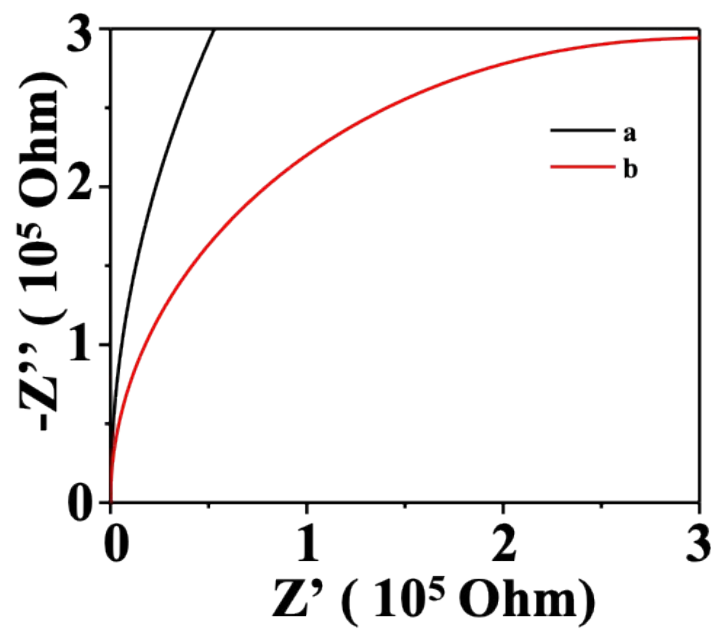

**Fig. S9.** Electrochemical impedance spectroscopy (EIS) of (a) the commercial P25 and (b)  $A_{76}/R_{24}$ - $TiO_2$  under AM1.5 irradiation

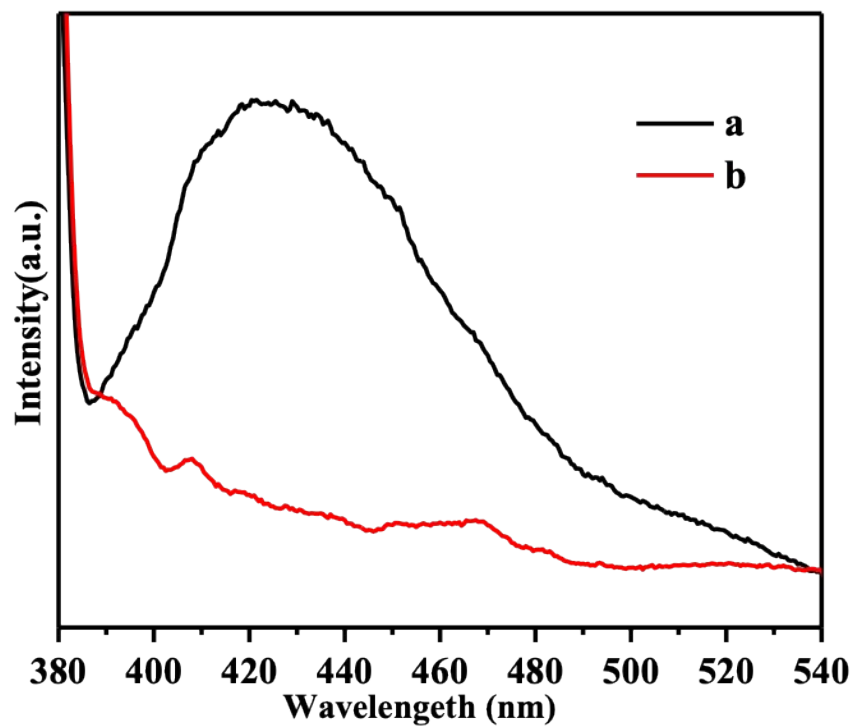

**Fig. S10.** The photoluminescence spectra of (a) the commercial P25 and (b) A<sub>76</sub>/R<sub>24</sub>-TiO<sub>2</sub>.

### 3. Supplementary Tables

**Table S1.** Table Caption Comparison of the H<sub>2</sub> evolution efficiency for the TiO<sub>2</sub>-based catalysts without using any co-catalysts.

| Photocatalyst (mg)                                         | Light source                      | Reactant solution                       | H <sub>2</sub> × 10 <sup>-3</sup> (mmol h <sup>-1</sup> ) | Ref.      |
|------------------------------------------------------------|-----------------------------------|-----------------------------------------|-----------------------------------------------------------|-----------|
| Hy-500, 20 mg                                              | AM1.5 (100 mWcm <sup>-2</sup> )   | 11%TEOA/ H <sub>2</sub> O               | 69.6                                                      | S1        |
| blue TiO <sub>2</sub> , 20 mg                              | AM1.5 (100 mWcm <sup>-2</sup> )   | 50% CH <sub>3</sub> OH/H <sub>2</sub> O | 69.2                                                      | S2        |
| Bi <sub>2</sub> O <sub>3</sub> Se/TiO <sub>2</sub> , 20mg  | 300 W Xe lamp                     | 5%glycerol/ H <sub>2</sub> O            | 24.8                                                      | S3        |
| TiO <sub>2</sub> @MOF FS, 10 mg                            | AM1.5 (100 mWcm <sup>-2</sup> )   | 8%TEOA/ H <sub>2</sub> O                | 4.4                                                       | S4        |
| TiO <sub>2</sub> nanorod, 5 mg                             | solar light                       | 5%glycerol/ H <sub>2</sub> O            | 3.535                                                     | S5        |
| H-Graphene-TiO <sub>2</sub> , 3 mg                         | 150 W Xe lamp<br>310 < λ < 625 nm | 20% CH <sub>3</sub> OH/H <sub>2</sub> O | 3.51                                                      | S6        |
| HC-TiO <sub>2</sub> , 20 mg                                | 300 W Xe lamp                     | 10%TEOA/ H <sub>2</sub> O               | 0.6608                                                    | S7        |
| TiO <sub>2</sub> /TiH <sub>2</sub> , 2 mg                  | AM1.5 (100 mWcm <sup>-2</sup> )   | 50% CH <sub>3</sub> OH/H <sub>2</sub> O | 0.44                                                      | S8        |
| anatase/rutile, 2 mg                                       | AM1.5 (100 mWcm <sup>-2</sup> )   | 50% CH <sub>3</sub> OH/H <sub>2</sub> O | 0.43                                                      | S9        |
| Grey TiO <sub>2</sub> , 2 mg                               | AM1.5 (100 mWcm <sup>-2</sup> )   | 50% CH <sub>3</sub> OH/H <sub>2</sub> O | 0.306                                                     | S10       |
| A <sub>76</sub> /R <sub>24</sub> -TiO <sub>2</sub> , 30 mg | AM1.5 (100 mWcm <sup>-2</sup> )   | 20% CH <sub>3</sub> OH/H <sub>2</sub> O | 68.1                                                      | This work |

**Table S2.** Table Caption Comparison of the H<sub>2</sub> evolution efficiency for the TiO<sub>2</sub>-based catalysts with co-catalysts.

| Photocatalyst                                               | Light source         | Reactant solution                          | Co-catalyst          | H <sub>2</sub><br>×10 <sup>-3</sup><br>(mmol h <sup>-1</sup> ) | Ref              |
|-------------------------------------------------------------|----------------------|--------------------------------------------|----------------------|----------------------------------------------------------------|------------------|
| S-doped H-TiO <sub>2</sub> , 100 mg                         | AM 1.5G              | 25% CH <sub>3</sub> OH/H <sub>2</sub> O    | 0.5% Pt              | 25.8                                                           | S11              |
| Co <sub>3</sub> O <sub>4</sub> QDs/TiO <sub>2</sub> , 50 mg | AM 1.5G              | 10% CH <sub>3</sub> OH/H <sub>2</sub> O    | 1% Pt                | 86.755                                                         | S12              |
| Ni-a/TiO <sub>2</sub> , 50 mg                               | 300W Xe lamp         | 10% CH <sub>3</sub> OH/H <sub>2</sub> O    | Atomic Ni (1.11 wt%) | 94.5                                                           | S13              |
| TiO <sub>2</sub> hierarchical microspheres ,<br>10 mg       | AM 1.5G              | 10% CH <sub>3</sub> OH/H <sub>2</sub> O    | Atomic Pt (0.36 wt%) | 117                                                            | S14              |
| Black TiO <sub>2</sub> microspheres ,<br>20 mg              | AM 1.5G              | 20%CH <sub>3</sub> OH/H <sub>2</sub> O     | 1% Pt                | 130.8                                                          | S15              |
| Co-TiO <sub>2</sub> , 100 mg                                | 300 W xenon arc lamp | 20% CH <sub>3</sub> OH/H <sub>2</sub> O    | Atomic Co (1.11 wt%) | 168.2                                                          | S16              |
| Cu-TiO <sub>2</sub> ,10 mg                                  | 300 W xenon arc lamp | 20% CH <sub>3</sub> OH/H <sub>2</sub> O    | Atomic Cu (0.75 wt%) | 177.7                                                          | S17              |
| triphas anatase-rutile-brookite TiO <sub>2</sub> ,<br>50 mg | 300 W Xe arc lamp    | 25% CH <sub>3</sub> OH/H <sub>2</sub> O    | 1% Au                | 178.5                                                          | S18              |
| Sub-10 nm rutile TiO <sub>2</sub> Nanoparticles,<br>100 mg  | AM 1.5G              | 10% CH <sub>3</sub> OH/H <sub>2</sub> O    | 1% Pt                | 195.4                                                          | S19              |
| H-TiO <sub>2</sub> , 20 mg                                  | AM 1.5G              | 50% CH <sub>3</sub> OH/H <sub>2</sub> O    | 0.6%Pt               | 200                                                            | S20              |
| Hydrogenated titanate nanotube,100 mg                       | AM 1.5G              | 20% CH <sub>3</sub> OH/H <sub>2</sub> O    | 1% Pt                | 215                                                            | S21              |
| TiO <sub>2</sub> ultrathin nanosheets , 30 mg               | AM 1.5G              | 20% CH <sub>3</sub> OH/H <sub>2</sub> O    | 1% Pt                | 540.69                                                         | S22              |
| Dehiscent mesoporous rutile TiO <sub>2</sub> ,<br>50 mg     | AM 1.5G              | 25% CH <sub>3</sub> OH/H <sub>2</sub> O    | 1% Pt                | 610.8                                                          | S23              |
| Ordered Meso-TiO <sub>2</sub> -25 microspheres , 50mg       | AM 1.5G              | 25% CH <sub>3</sub> OH/H <sub>2</sub> O    | 1% Pt                | 630                                                            | S24              |
| Al reduced H-TiO <sub>2</sub> , 100 mg                      | AM 1.5G              | 25% CH <sub>3</sub> OH/H <sub>2</sub> O    | 0.5% Pt              | 640                                                            | S25              |
| <b>A<sub>76</sub>/R<sub>24</sub>-TiO<sub>2</sub>, 30 mg</b> | <b>AM 1.5G</b>       | <b>20% CH<sub>3</sub>OH/H<sub>2</sub>O</b> | <b>1% Pt</b>         | <b>562.56</b>                                                  | <b>This work</b> |

**Table S3.** Comparison of methods that can modulate the composition of the TiO<sub>2</sub> phase.

| Photocatalyst                                      | Temperature | Pressure | Time      | Materials                                                                                    | Cost   | H <sub>2</sub> production with/without cocatalyst / (μmol h <sup>-1</sup> ) | Reference                                     |
|----------------------------------------------------|-------------|----------|-----------|----------------------------------------------------------------------------------------------|--------|-----------------------------------------------------------------------------|-----------------------------------------------|
| P25                                                | 1800°C      | High     | ***       | TiCl <sub>4</sub>                                                                            | High   | 131/2.415 <sup>a</sup> (30 mg)                                              | Degussa P25                                   |
| Ordered Meso-TiO <sub>2</sub> -25 microspheres     | 400°C       | Normal   | ~ 31 h    | Pluronic F127, HCl, HOAc, TBOT, THF                                                          | Normal | 630/*** (50 mg)                                                             | Chem. Sci., 2019, 10, 1664-1670.              |
| anatase/rutile TiO <sub>2</sub>                    | 500°C       | 20 bar   | 1 h-3 day | TiO <sub>2</sub> (anatase, rutile and mixed phase), purity H <sub>2</sub> (purity 99.999 %). | High   | ***/0.215 (2 mg)                                                            | Angew. Chem., Int. Ed., 2014, 53, 14201-14205 |
| triphas anatase-rutile-brookite TiO <sub>2</sub>   | 100°C       | Normal   | ~ 38 h    | HCl, HOAc, TiCl <sub>4</sub> , PEI                                                           | Normal | 178.5/***(50 mg)                                                            | Adv. Energy Mater., 2019, 9, 1901634          |
| A <sub>76</sub> /R <sub>24</sub> -TiO <sub>2</sub> | 500°C       | Normal   | ~ 30 h    | TiCl <sub>4</sub> , PVA, NMP                                                                 | Low    | 563/68.19 (30 mg)                                                           | This work                                     |

Note: <sup>a</sup> The P25 photocatalytic hydrogen production values were measured in our laboratory. \*\*\*Represents a failure of the data to be found in the literature.

#### 4. Supplemental References

- S1 Y. Jiang, H. Ning, C. Tian, B. Jiang, Q. Li, H. Yan, X. Zhang, J. Wang, L. Jing and H. Fu, Single-crystal TiO<sub>2</sub> nanorods assembly for efficient and stable cocatalyst-free photocatalytic hydrogen evolution, *Appl. Catal., B*, 2018, **229**, 1-7.
- S2 K. Zhang, L. Wang, J. K. Kim, M. Ma, G. Veerappan, C.-L. Lee, K.-j. Kong, H. Lee and J. H. Park, An order/disorder/water junction system for highly efficient co-catalyst-free photocatalytic hydrogen generation, *Energy Environ. Sci.*, 2016, **9**, 499-503.
- S3 D. Ding, Z. Jiang, D. Ji, M. Nosang Vincent and L. Zan, Bi<sub>2</sub>O<sub>2</sub>Se as a novel co-catalyst for photocatalytic hydrogen evolution reaction, *Chem. Eng. J.*, 2020, **400**, 125931.
- S4 L. Sun, Y. Yuan, F. Wang, Y. Zhao, W. Zhan and X. Han, Selective wet-chemical etching to create TiO<sub>2</sub>@MOF frame heterostructure for efficient photocatalytic hydrogen evolution, *Nano Energy*, 2020, **74**, 104909.
- S5 N. L. Reddy, D. P. Kumar and M. V. Shankar, Co-catalyst free Titanate Nanorods for improved Hydrogen production under solar light irradiation, *J. Chem. Sci. (Bangalore, India)*, 2016, **128**, 649-656.



- S6 T.-D. Nguyen-Phan, S. Luo, Z. Liu, A. D. Gamalski, J. Tao, W. Xu, E. A. Stach, D. E. Polyansky, S. D. Senanayake, E. Fujita and J. A. Rodriguez, Striving Toward Noble-Metal-Free Photocatalytic Water Splitting: The Hydrogenated-Graphene-TiO<sub>2</sub> Prototype, *Chem. Mater.*, 2015, **27**, 6282-6296.
- S7 G. Jia, Y. Wang, X. Cui and W. Zheng, Highly Carbon-Doped TiO<sub>2</sub> Derived from MXene Boosting the Photocatalytic Hydrogen Evolution, *ACS Sustainable Chem. Eng.*, 2018, **6**, 13480-13486.
- S8 N. Liu, X. Zhou, N. T. Nguyen, K. Peters, F. Zoller, I. Hwang, C. Schneider, M. E. Miehlich, D. Freitag, K. Meyer, D. Fattakhova-Rohlfing and P. Schmuki, Black Magic in Gray Titania: Noble-Metal-Free Photocatalytic H<sub>2</sub> Evolution from Hydrogenated Anatase, *ChemSusChem*, 2017, **10**, 62-67.
- S9 N. Liu, C. Schneider, D. Freitag, U. Venkatesan, V. R. R. Marthala, M. Hartmann, B. Winter, E. Spiecker, A. Osvet, E. M. Zolnhofer, K. Meyer, T. Nakajima, X. Zhou and P. Schmuki, Hydrogenated Anatase: Strong Photocatalytic Dihydrogen Evolution without the Use of a Co-Catalyst, *Angew. Chem., Int. Ed.*, 2014, **53**, 14201-14205.
- S10 X. Zhou, N. Liu, J. Schmidt, A. Kahnt, A. Osvet, S. Romeis, E. M. Zolnhofer, V. R. R. Marthala, D. M. Guldi, W. Peukert, M. Hartmann, K. Meyer and P. Schmuki, Noble-Metal-Free Photocatalytic Hydrogen Evolution Activity: The Impact of Ball Milling Anatase Nanopowders with TiH<sub>2</sub>, *Adv. Mater.*, 2017, **29**, 1604747.
- S11 C. Yang, Z. Wang, T. Lin, H. Yin, X. Lü, D. Wan, T. Xu, C. Zheng, J. Lin, F. Huang, X. Xie and M. Jiang, Core-Shell Nanostructured “Black” Rutile Titania as Excellent Catalyst for Hydrogen Production Enhanced by Sulfur Doping, *J. Am. Chem. Soc.*, 2013, **135**, 17831-17838.
- S12 J. Liu, J. Ke, Y. Li, B. Liu, L. Wang, H. Xiao and S. Wang, Co<sub>3</sub>O<sub>4</sub> quantum dots/TiO<sub>2</sub> nanobelt hybrids for highly efficient photocatalytic overall water splitting, *Appl. Catal., B*, 2018, **236**, 396-403.
- S13 M. Xiao, L. Zhang, B. Luo, M. Lyu, Z. Wang, H. Huang, S. Wang, A. Du and L. Wang, Molten-Salt-Mediated Synthesis of an Atomic Nickel Co-catalyst on TiO<sub>2</sub> for Improved Photocatalytic H<sub>2</sub> Evolution, *Angew. Chem., Int. Ed.*, 2020, **59**, 7230-7234.
- S14 J. Xi, X. Zhang, X. Zhou, X. Wu, S. Wang, W. Yu, N. Yan, K. P. Loh and Q.-H. Xu, Titanium dioxide hierarchical microspheres decorated with atomically dispersed platinum as an efficient photocatalyst for hydrogen evolution, *J. Colloid Interface Sci.*, 2022, **623**, 799-807.
- S15 C. Wang, X. Kang, J. Liu, D. Wang, N. Wang, J. Chen, J. Wang, C. Tian and H. Fu, Ultrathin black TiO<sub>2</sub> nanosheet-assembled microspheres with high stability for efficient solar-driven photocatalytic hydrogen evolution, *Inorg. Chem. Front.*, 2023, **10**, 1153-1163.
- S16 X. Wu, S. Zuo, M. Qiu, Y. Li, Y. Zhang, P. An, J. Zhang, H. Zhang and J. Zhang, Atomically defined Co on two-dimensional TiO<sub>2</sub> nanosheet for photocatalytic hydrogen evolution, *Chem. Eng. J.*, 2021, **420**, 127681.

- S17 Y. Ma, Y. Zhang, Y. Ma, T. Lv, B. Xiao, X. Kuang, X. Deng, J. Zhang, J. Zhao and Q. Liu, *In situ* Cu single atoms anchoring on MOF-derived porous TiO<sub>2</sub> for the efficient separation of photon-generated carriers and photocatalytic H<sub>2</sub> evolution, *Nanoscale*, 2022, **14**, 15889-15896.
- S18 H. Xiong, L. Wu, Y. Liu, T. Gao, K. Li, Y. Long, R. Zhang, L. Zhang, Z.-A. Qiao, Q. Huo, X. Ge, S. Song and H. Zhang, Controllable Synthesis of Mesoporous TiO<sub>2</sub> Polymorphs with Tunable Crystal Structure for Enhanced Photocatalytic H<sub>2</sub> Production, *Adv. Energy Mater.*, 2019, **9**, 1901634.
- S19 L. Li, J. Yan, T. Wang, Z.-J. Zhao, J. Zhang, J. Gong and N. Guan, Sub-10 nm rutile titanium dioxide nanoparticles for efficient visible-light-driven photocatalytic hydrogen production, *Nat. Commun.*, 2015, **6**, 5881.
- S20 X. Chen, L. Liu, P. Y. Yu and S. S. Mao, Increasing Solar Absorption for Photocatalysis with Black Hydrogenated Titanium Dioxide Nanocrystals, *Science*, 2011, **331**, 746-750.
- S21 Z. Zheng, B. Huang, J. Lu, Z. Wang, X. Qin, X. Zhang, Y. Dai and M.-H. Whangbo, Hydrogenated titania: synergy of surface modification and morphology improvement for enhanced photocatalytic activity, *Chem. Commun. (Cambridge, U. K.)*, 2012, **48**, 5733.
- S22 S. Hu, P. Qiao, L. Zhang, B. Jiang, Y. Gao, F. Hou, B. Wu, Q. Li, Y. Jiang, C. Tian, W. Zhou, G. Tian and H. Fu, Assembly of TiO<sub>2</sub> ultrathin nanosheets with surface lattice distortion for solar-light-driven photocatalytic hydrogen evolution, *Appl. Catal., B*, 2018, **239**, 317-323.
- S23 K. Lan, R. Wang, W. Zhang, Z. Zhao, A. Elzatahry, X. Zhang, Y. Liu, D. Al-Dhayan, Y. Xia and D. Zhao, Mesoporous TiO<sub>2</sub> Microspheres with Precisely Controlled Crystallites and Architectures, *Chem*, 2018, **4**, 2436-2450.
- S24 W. Zhang, H. He, Y. Tian, K. Lan, Q. Liu, C. Wang, Y. Liu, A. Elzatahry, R. Che, W. Li and D. Zhao, Synthesis of uniform ordered mesoporous TiO<sub>2</sub> microspheres with controllable phase junctions for efficient solar water splitting, *Chem. Sci.*, 2019, **10**, 1664-1670.
- S25 Z. Wang, C. Yang, T. Lin, H. Yin, P. Chen, D. Wan, F. Xu, F. Huang, J. Lin, X. Xie and M. Jiang, Visible-light photocatalytic, solar thermal and photoelectrochemical properties of aluminium-reduced black titania, *Energy Environ. Sci.*, 2013, **6**, 3007.
